# Supplementary material for: Identifying caregiver-reported modifiable barriers to pediatric oncology clinical trial enrollment and participation
Source: Research Square preprint supplement (doi:10.21203/rs.3.rs-7134172/v1), 2025-09-15
Supplement: Supplementary file 1 [file 4611aa78e0f1a6b3d615c69b.docx]

**Article name:** Identifying caregiver-reported modifiable barriers to pediatric oncology clinical trial enrollment and participation

**Journal name:** *Supportive Care in Cancer*

**Author info:**

Rebecca Whitmire, MD, MPH1,2, Daniel Wikstrom,2 Robin Lockridge, PhD2, Elizabeth Holland2, Angelina Van Sprang2, Mary Anne Toledo-Tamula, MA2, Srivandana Akshintala, MBBS, MPH2, Rosandra N. Kaplan, MD2, Pamela L. Wolters, PhD2, and Staci Martin, PhD2

1 Johns Hopkins Sydney Kimmel Comprehensive Cancer Center Division of Pediatric Oncology

2 Pediatric Oncology Branch, National Cancer Institute

Corresponding Author: Rebecca Whitmire, MD, MPH

1800 Orleans Street

Baltimore, MD 21287

[rebeccawhitmire19@gmail.com](mailto:rebeccawhitmire19@gmail.com)

**Supplemental Information**

**Table S1** Recruitment Contacts

| **Recruitment Contacts** |
| --- |
| Children’s Oncology Group Diversity and Health Disparities Committee |
| DC Candlelighters |
| BASE Camp |
| Be Positive |
| Children’s Brain Tumor Foundation |
| Cancer Care Teen Talk Adolescent Support Group |
| Cactus Cancer Society |
| Leukemia and Lymphoma Society Phoenix General Blood Cancer Support Group |
| Leukemia and Lymphoma Society [Tennessee & Alabama] |
| Ulman Foundation Young Adult Group |
| Your Support Group (Illinois Cancer Care) |
| The Cancer Support Center |
| Gilda’s Club |
| 13Thirty |
| the Be Loud! Sophie Foundation |
| Elephants and Tea |
| Leukemia and Lymphoma Society |
| Gilda's Club Metro Detroit |
| Gilda's Club of the Quad Cities |
| Cancer Support Community Los Angeles |
| Children's National Medical Center |
| Behavioral Health Core (NIH) |
| Southwest Kids Cancer Foundation |
| Brooke’s Blossoming Hope |
| Arms Wide Open Childhood Cancer Foundation |
| Coalition Against Childhood Cancer |
| The Cancer Support Community Arizona |

List of organizations who were contacted to assist with participant recruitment.

**Figure S1.** Geographic Distribution of Study Sample


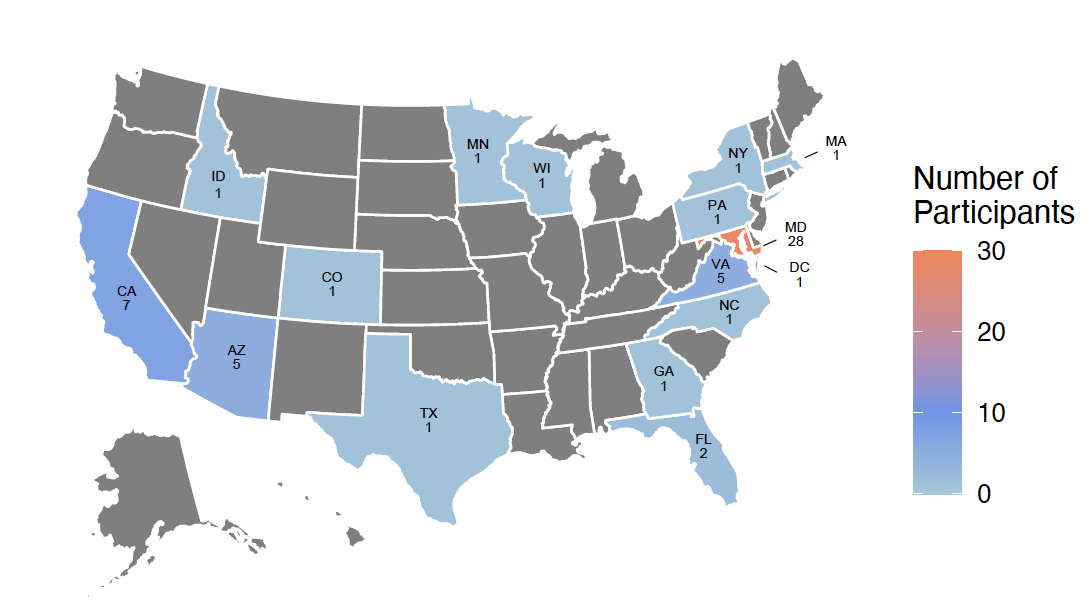


Geographic distribution of study participants overlaid on a map of United States. The number of participants in each state is listed below the state initials.

**Figure S2. Barriers reported by caregivers whose child did not participate in a trial**





This figure demonstrates participant Likert scale responses to barriers to pediatric oncology clinical trial enrollment as asked in the RPS-C among caregivers whose children did not participate in a clinical trial.

**Figure S3. Pre-enrollment barriers reported by caregivers whose child(ren) participated in a trial**



This figure demonstrates participant Likert scale responses to barriers to pediatric oncology clinical trial enrollment as asked in the RPS-C among caregivers whose children participated in a clinical trial. Caregivers were whether and to what extent the listed potential barriers made deciding to enroll in the clinical trial difficult.

**Figure S4. Caregiver-reported barriers experienced during child’s clinical trial participation**





This figure demonstrates participant Likert scale responses to barriers to pediatric oncology clinical trial participation as asked in the RPS-C among caregivers whose children participated in a clinical trial. Caregivers were whether and to what extent the listed potential barriers made continued participation in the clinical trial difficult.

**Figure S5. Caregiver-reported facilitators to clinical trial enrollment and benefits to clinical trial participation**



This figure demonstrates participant Likert scale responses to facilitators to pediatric oncology clinical trial enrollment and benefits to clinical trial participation as asked in the RPS-C among caregivers whose children participated in a clinical trial. Caregivers were whether and to what extent the listed potential facilitators impacted their decision to enroll their child in a clinical trial. Caregivers were also asked whether and to what extent the listed potential benefits were experienced by their child or by themselves/their family while their child was participating in the clinical trial.
